# Supplementary material
Source: PubMed Central journal article supplement (PMC4979233)

**Bias correction methods explain much of the variation seen in breast cancer risks of BRCA1/2 mutation carriers**

**Janet R. Vos, et al**

**Supplementary table 1** Overview of full or partial clinical studies with breast cancer CLTR estimations by age 70 in *BRCA1/2* mutation carriers

| Study                        | Year | Ascertainment                                                                                                                                                       | Analysis                                              | Bias correction method                                                                                                                                                                                                                    | Censoring, at age of                     | BC by age 70 CLTR (95% CI) |              | BC/OC by age 70 CLTR (95% CI) |              |
|------------------------------|------|---------------------------------------------------------------------------------------------------------------------------------------------------------------------|-------------------------------------------------------|-------------------------------------------------------------------------------------------------------------------------------------------------------------------------------------------------------------------------------------------|------------------------------------------|----------------------------|--------------|-------------------------------|--------------|
|                              |      |                                                                                                                                                                     |                                                       |                                                                                                                                                                                                                                           |                                          | <i>BRCA1</i>               | <i>BRCA2</i> | <i>BRCA1</i>                  | <i>BRCA2</i> |
| Dorum et al <sup>6</sup>     | 1999 | Family cancer clinic series and consecutive ovarian-cancer series from Sweden and Norway, families harboring <i>BRCA1</i> founder mutation 1135insA or 1675delA     | Kaplan-Meier analysis                                 | Including all female mutation carriers (demonstrated, affected or obligate), excluding index cases                                                                                                                                        | Death or last contact (RRM N=0)          | ± 52 & 57                  | NA           | NA                            | NA           |
|                              |      |                                                                                                                                                                     |                                                       | Including all female mutation carriers (demonstrated, affected or obligate), excluding index cases                                                                                                                                        | RRSO, death or last contact              | NA                         | NA           | 90 (SE: 3)                    | NA           |
|                              |      |                                                                                                                                                                     |                                                       | Including all female mutation carriers (demonstrated, affected or obligate) and their untested unaffected sisters, excluding index cases                                                                                                  |                                          | NA                         | NA           | 70 (SE: 4)                    | NA           |
|                              |      |                                                                                                                                                                     |                                                       | Including all female mutation carriers (demonstrated, affected or obligate) and a proportion of their untested unaffected sisters, excluding index cases                                                                                  |                                          | NA                         | NA           | 76 (SE: 7)                    | NA           |
| Einbeigi et al <sup>14</sup> | 2001 | <i>BRCA1</i> founder mutation 3171insA Family cancer clinic, Sweden                                                                                                 | Kaplan-Meier analysis                                 | Including all female mutation carriers (proven or obligate) and affected sister, excluding index cases                                                                                                                                    | RRSO, death or last contact (RRM N=0)    | NA                         | NA           | 93 (80-99)                    | NA           |
|                              |      |                                                                                                                                                                     |                                                       | Including all female mutation carriers (demonstrated, affected or obligate) and all sisters, excluding index cases                                                                                                                        |                                          | NA                         | NA           | 59 (46-73)                    | NA           |
| Brose et al <sup>19</sup>    | 2002 | Consecutive cohort of <i>BRCA1</i> mutation carriers, counseled at a family cancer clinic, USA (BCLC)                                                               | Life-table method                                     | Including all female mutation carriers (proven, obligate and presumed)                                                                                                                                                                    | Death or last contact                    | 73 (68-78)                 | NA           | NA                            | NA           |
| Heimdal et al <sup>21</sup>  | 2003 | Family cancer clinic series and consecutive breast and ovarian cancer series, Norway, families harboring founder mutation 816delGT, 1135insA, 1675delA or 3347delAG | Kaplan-Meier analysis                                 | Including all female mutation carriers (demonstrated, affected or obligate), excluding index cases                                                                                                                                        | RRM, OC, death or last contact           | 58 (51-66)                 | NA           | NA                            | NA           |
|                              |      |                                                                                                                                                                     |                                                       | Including all female mutation carriers (demonstrated, affected or obligate), excluding index cases                                                                                                                                        | Death, last contact or 110 yrs           | NA                         | NA           | 84 (SE: 2)                    | NA           |
|                              |      |                                                                                                                                                                     |                                                       | Including all female mutation carriers (demonstrated, affected or obligate) and their untested unaffected FDRs, excluding index cases                                                                                                     |                                          | NA                         | NA           | 62 (SE: 2)                    | NA           |
|                              |      |                                                                                                                                                                     |                                                       | Including all female mutation carriers (demonstrated, affected or obligate) and a proportion of their untested unaffected FDRs, excluding index cases                                                                                     |                                          | NA                         | NA           | 70 (SE: - )                   | NA           |
| Scott et al <sup>24</sup>    | 2003 | High-risk families and known <i>BRCA</i> families, Australia (kConFab)                                                                                              | Modified segregation analysis (MLE: joint likelihood) | Maximized the conditional likelihood of all phenotypic and genotypic information in the family given the breast cancer status and age at diagnosis or else age interview of all family members, and genetic information of the index case | RRM, RRSO, death, last contact or 85 yrs | 48 (22-82)                 | 74 (50-93)   | NA                            | NA           |
| Southey et al <sup>25</sup>  | 2003 | Family cancer clinic series, <i>BRCA1</i> families with putative splice site mutation IVS6-2delA, Australia (kConFab)                                               | Modified segregation analysis (MLE: joint likelihood) | Maximized the conditional likelihood of all phenotypic and genotypic information in the family given the breast cancer status of all family members                                                                                       | Death or last contact                    | 49 (13-96)                 | NA           | NA                            | NA           |
| Marroni et al <sup>26</sup>  | 2004 | Family cancer clinic series including high-risk families both positive and negative for <i>BRCA1/2</i> mutations, Italy                                             | MCMC                                                  | Retrospective likelihood conditioned on all phenotypic data                                                                                                                                                                               | -                                        | 39 (27-52)                 | 44 (29-58)   | NA                            | NA           |

|                                  |      |                                                                                                                                           |                               |                                                                                                                      |                                                                           |                                 |            |            |            |
|----------------------------------|------|-------------------------------------------------------------------------------------------------------------------------------------------|-------------------------------|----------------------------------------------------------------------------------------------------------------------|---------------------------------------------------------------------------|---------------------------------|------------|------------|------------|
| Kroiss et al <sup>28</sup>       | 2005 | Consecutive cohort of female <i>BRCA1/2</i> mutation carriers counseled at the family cancer clinic, Austria                              | Kaplan-Meier analysis         | -                                                                                                                    | RRM, RRSO, death or last contact                                          | 85 (75-97)                      | NA         | NA         | NA         |
| Tesoriero et al <sup>29</sup>    | 2005 | High-risk families and known <i>BRCA</i> families, <i>BRCA1/2</i> families with splice site variants, Australia and New Zealand (kConFab) | Modified segregation analysis | Joint likelihood conditioned on all phenotypic data in the family and the genotypic information of the index carrier | RRM, RRSO, death, last contact or 85 yrs                                  | 64 (28-96)                      | 79 (48-98) | NA         | NA         |
| Antoniou et al <sup>30</sup>     | 2006 | High-risk French-Canadian breast and/or ovarian cancer families                                                                           | Modified segregation analysis | Joint likelihood conditioned on all phenotypic data in the family and the genotypic information of the index carrier | OC, death, last contact or 70 yrs                                         | 72 (0-93)                       | 75 (0-97)  | NA         | NA         |
|                                  |      |                                                                                                                                           |                               |                                                                                                                      | Death, last contact or 70 yrs                                             | NA                              | NA         | 83 (34-96) | 89 (34-98) |
| Chen et al <sup>31</sup>         | 2006 | Population-based and clinic-based high-risk families                                                                                      | MCMC                          | Mendelian retrospective likelihood conditioned on all phenotypic data                                                | -                                                                         | 46 (39-54)                      | 43 (36-51) |            | NA         |
| Vogl et al <sup>37</sup>         | 2007 | High-risk family <i>BRCA1</i> mutation 4056C>T, USA                                                                                       | Kaplan-Meier analysis         | Including all proven female mutation carriers, excluding ascertainment cases                                         | Death or last contact (RRM N=0)                                           | 53 (35-75)                      | NA         | NA         | NA         |
|                                  |      |                                                                                                                                           | Segregation analysis          | Retrospective likelihood conditioned on all phenotypic data                                                          |                                                                           | 39 (29-49)                      | NA         | NA         | NA         |
|                                  |      |                                                                                                                                           | Segregation analysis          | Conditional likelihood (MLOD) on all affected individuals                                                            |                                                                           | 30 (17-47)                      | NA         | NA         | NA         |
| Evans et al <sup>40</sup>        | 2008 | Family cancer clinics, England                                                                                                            | Kaplan-Meier analysis         | Including proven and obligate female mutation carriers, and a proportion of FDRs                                     | RRM, OC, RRSO, death or last contact                                      | 68 (65-71)                      | 75 (72-78) | NA         | NA         |
|                                  |      |                                                                                                                                           |                               | Including unaffected carriers and FDRs at time of family ascertainment                                               |                                                                           | 30-79yr: annual incidence of 2% |            | NA         | NA         |
| Milne et al <sup>41</sup>        | 2008 | Family cancer clinic, Spain                                                                                                               | Modified segregation analysis | Joint likelihood conditioned on all phenotypic data in the family and the genotypic information of the index carrier | RRM, other cancers, RRSO, death, last contact or age 70                   | 52 (26-69)                      | 47 (29-60) | NA         | NA         |
| Cardenosa et al <sup>44</sup>    | 2010 | Family cancer clinic, Spain                                                                                                               | Kaplan-Meier analysis         | -                                                                                                                    | Last contact                                                              | NA                              | NA         | 78 (71-85) |            |
| Beristain et al <sup>50</sup>    | 2010 | Family cancer clinic, Spain                                                                                                               | Kaplan-Meier analysis         | Including index cases                                                                                                | OC, RRSO, death or last contact (RRM N=0)                                 | 64 (39-78)                      | 69 (40-84) | NA         | NA         |
|                                  |      |                                                                                                                                           |                               | Excluding index cases                                                                                                |                                                                           | 36 (5-57)                       | 38 (12-56) | NA         |            |
| Van der Kolk et al <sup>51</sup> | 2010 | Family cancer clinic, Northern-Netherlands                                                                                                | Kaplan-Meier analysis         | Including index cases                                                                                                | RRM, RRSO<50 yrs, death or last contact                                   | 71 (67-82)                      | 88 (82-93) | NA         | NA         |
|                                  |      |                                                                                                                                           |                               | Excluding index cases                                                                                                |                                                                           | 60 (55-66)                      | 78 (69-88) | NA         |            |
| Tea et al <sup>53</sup>          | 2014 | Family Cancer Clinic, Austria                                                                                                             | Kaplan-Meier analysis         | Including index cases, excluding obligate carriers                                                                   | RRM,RRSO, death or last contact                                           | NA                              | 88 (81-95) | NA         | NA         |
| Brohet et al <sup>54</sup>       | 2014 | Family cancer clinic series, the Netherlands                                                                                              | Modified segregation analysis | Joint likelihood conditioned on all phenotypic data in the family and the genotypic information of the index carrier | RRM, OC, RRSO, death, last contact, last DNA-test family member or 70 yrs | 45 (36-52)                      | 27 (14-38) | NA         | NA         |
| Vos et al <sup>52</sup>          | 2014 | Family cancer clinics, the Netherlands                                                                                                    | Kaplan-Meier analysis         | Including index cases                                                                                                | RRM, OC, RRSO, death or last contact                                      | 72 (66-78)                      | 78 (69-85) | NA         | NA         |
|                                  |      |                                                                                                                                           |                               | Excluding index cases                                                                                                |                                                                           | 76 (71-79)                      | 72 (64-78) | NA         |            |
|                                  |      |                                                                                                                                           |                               |                                                                                                                      |                                                                           | 58 (50-66)                      | 64 (50-75) | NA         | NA         |
|                                  |      |                                                                                                                                           |                               |                                                                                                                      |                                                                           | 68 (62-73)                      | 61 (50-69) |            |            |

BC, breast cancer; FDRs, first-degree relatives; MCMC, Markov Chain Monte Carlo; MLE, maximum likelihood estimate; MLOD, maximum logarithm of the odds; OC, ovarian cancer; RRM, risk-reducing mastectomy; RRSO, risk-reducing salpingo-oophorectomy; NA, not applicable.

**Supplementary Figure 1** Flow diagram of the literature search

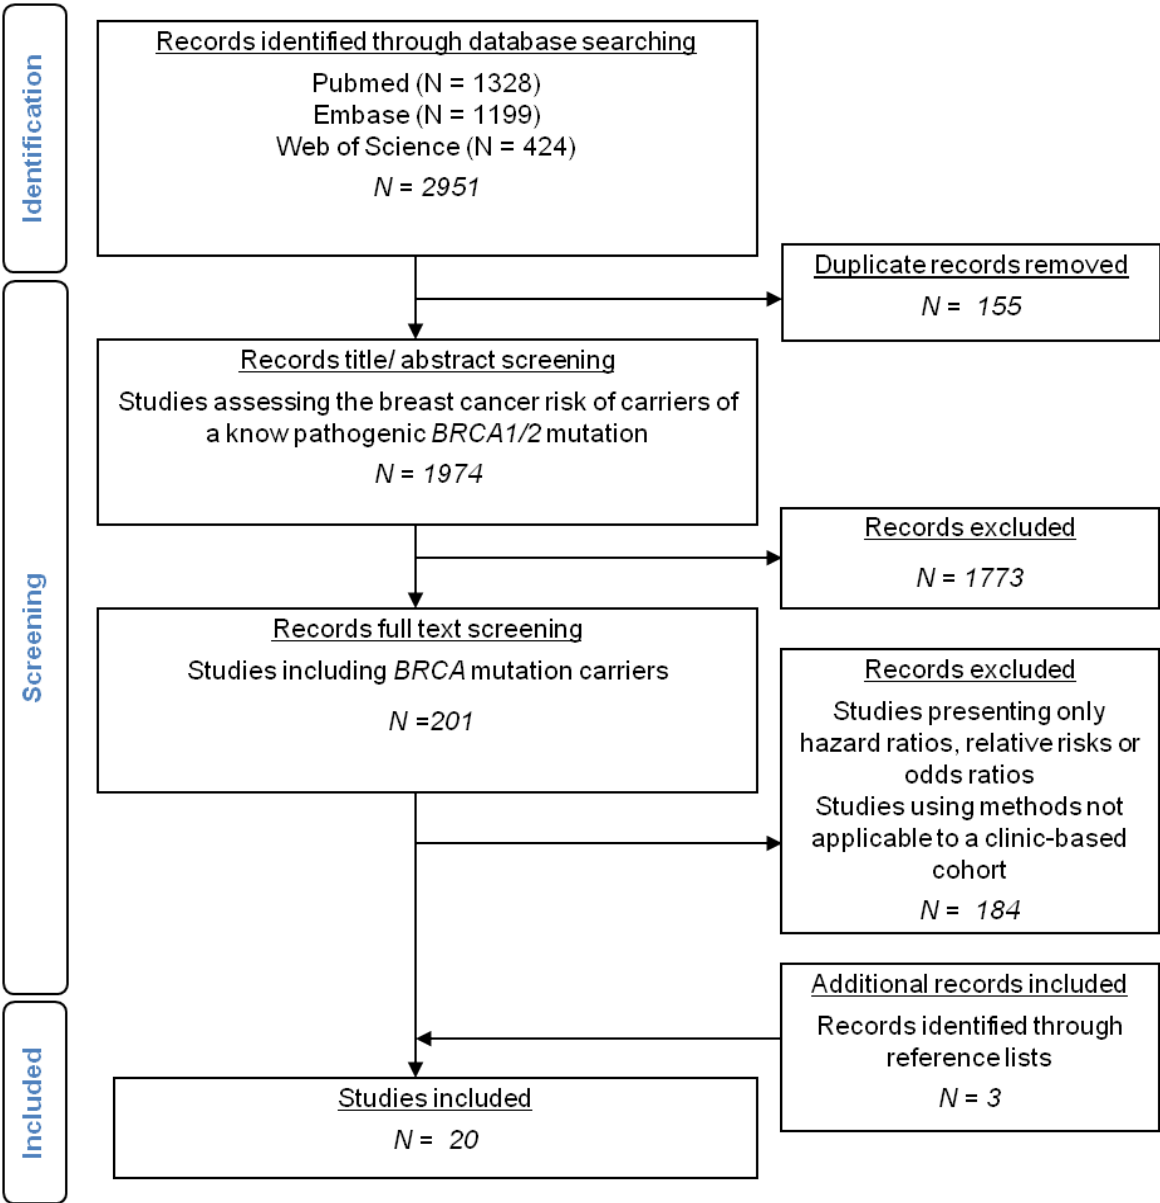

Supplement: supp_JCO.2014.59.0463_DS_2014.590463.pdf [file supp_JCO.2014.59.0463_DS_2014.590463.pdf]
